# Supplementary material
Source: ML conference proceedings conference paper supplement (https://openaccess.thecvf.com/content/CVPR2021/html/Manandhar_Magic_Layouts_Structural_CVPR_2021_paper.html)
Supplement: Supplementary file 1 [file Manandhar_Magic_Layouts_Structural_CVPR_2021_supplemental.zip]

# Magic Layouts: Structural Prior for Component Detection in User Interface Designs - Supplementary Materials

Dipu Manandhar<sup>1</sup>, Hailin Jin<sup>2</sup>, John Collomosse<sup>1,2</sup>

<sup>1</sup>CVSSP, University of Surrey, — Guildford, UK

<sup>2</sup>Adobe Research, Creative Intelligence Lab — San Jose, CA.

d.manandhar@surrey.ac.uk, {hljin, collomos}@adobe.com

## 1. Magic Layouts Tool

We have included a demo video for Magic Layouts showing how UXs are parsed and rapidly converted to digital prototypes demonstrating its practical use. Please watch the demo video.

## 2. Impact of $Nr$

We conduct experiments to evaluate the impact of number of proposal sampled from each image ( $N_r$ ) during training. Table 1 and Table 2 show the performance of the proposed Magic Layout with FPN architecture for various  $N_r = \{64, 128, 256, 512\}$  on RICO and DrawnUI dataset respectively. Both mean Average Precision (AP) and Average Recall (AR) slightly decreases (1-2%) while using lower  $N_r$  value *e.g.* 64, 128. Overall for both RICO and DrawnUI datasets,  $N_r=256$  is sufficient for obtaining good precision and recall metrics.

## 3. Additional Results

Fig. 1 & 2 and Fig. 3 & 4 provide additional examples of UX parsed by the proposed Magic Layout for RICO [1] and DrawnUI [2] respectively.

## References

- [1] Biplob Deka, Zifeng Huang, Chad Franzen, Joshua Hibschman, Daniel Afergan, Yang Li, Jeffrey Nichols, and Ranjitha Kumar. Rico: A mobile app dataset for building data-driven design applications. In *Proceedings of the 30th Annual Symposium on User Interface Software and Technology*, UIST '17, 2017.
- [2] Dimitri Fichou, Raul Berari, Paul Brie, Mihai Dogariu, Liviu Daniel Ștefan, Mihai Gabriel Constantin, and Bogdan Ionescu. Overview of ImageCLEFdrawnUI 2020: The detection and recognition of hand drawn website uis task. In *CLEF2020 Working Notes*, CEUR Workshop Proceedings, Thessaloniki, Greece, September 22-25 2020. CEUR-WS.org <<http://ceur-ws.org>>.

Table 1. Performance of proposed method (FPN+Magic) on RICO dataset [1] different  $N_r$  values

| Method              | AP     | AP50 | AP75 | APs    | APm    | API    | AR     | AR     | AR     | ARs    | ARm    | ARl    |
|---------------------|--------|------|------|--------|--------|--------|--------|--------|--------|--------|--------|--------|
| @IoU                | 0.5:95 | 0.5  | 0.75 | 0.5:95 | 0.5:95 | 0.5:95 | 0.5:95 | 0.5:95 | 0.5:95 | 0.5:95 | 0.5:95 | 0.5:95 |
| maxDets             | 100    | 100  | 100  | 100    | 100    | 100    | 1      | 10     | 100    | 100    | 100    | 100    |
| FPN+Magic $N_r=64$  | 48.5   | 58.5 | 51.4 | 7.0    | 31.4   | 48.5   | 42.2   | 61.8   | 63.9   | 12.8   | 45.0   | 63.4   |
| FPN+Magic $N_r=128$ | 49.5   | 59.4 | 52.3 | 8.1    | 33.8   | 49.5   | 42.8   | 62.6   | 64.7   | 13.2   | 46.4   | 64.1   |
| FPN+Magic $N_r=256$ | 50.3   | 60.1 | 53.4 | 8.4    | 34.7   | 50.2   | 43.0   | 63.0   | 65.0   | 13.2   | 46.4   | 64.5   |
| FPN+Magic $N_r=512$ | 50.8   | 60.5 | 53.7 | 9.1    | 36.6   | 50.7   | 42.5   | 62.4   | 64.4   | 14.2   | 48.3   | 63.7   |

Table 2. Performance of proposed method (FPN+Magic) on DrawnUI dataset [2] different  $N_r$  values

| Method              | AP     | AP50 | AP75 | APs    | APm    | API    | AR     | AR     | AR     | ARs    | ARm    | ARl    |
|---------------------|--------|------|------|--------|--------|--------|--------|--------|--------|--------|--------|--------|
| @IoU                | 0.5:95 | 0.5  | 0.75 | 0.5:95 | 0.5:95 | 0.5:95 | 0.5:95 | 0.5:95 | 0.5:95 | 0.5:95 | 0.5:95 | 0.5:95 |
| maxDets             | 100    | 100  | 100  | 100    | 100    | 100    | 1      | 10     | 100    | 100    | 100    | 100    |
| FPN+Magic $N_r=64$  | 61.8   | 87.8 | 71.5 | 34.2   | 58.8   | 63.2   | 28.9   | 65.2   | 69.4   | 38.9   | 66.3   | 69.6   |
| FPN+Magic $N_r=128$ | 63.3   | 89.0 | 73.8 | 32.6   | 59.0   | 65.1   | 30.5   | 66.8   | 71.2   | 37.6   | 66.4   | 71.5   |
| FPN+Magic $N_r=256$ | 64.3   | 89.5 | 74.4 | 32.2   | 54.4   | 66.5   | 30.3   | 66.7   | 71.0   | 37.1   | 64.0   | 71.7   |
| FPN+Magic $N_r=512$ | 64.1   | 89.7 | 75.3 | 32.8   | 59.9   | 65.9   | 30.2   | 67.0   | 71.2   | 37.4   | 65.7   | 71.7   |

## A. RICO Screenshots

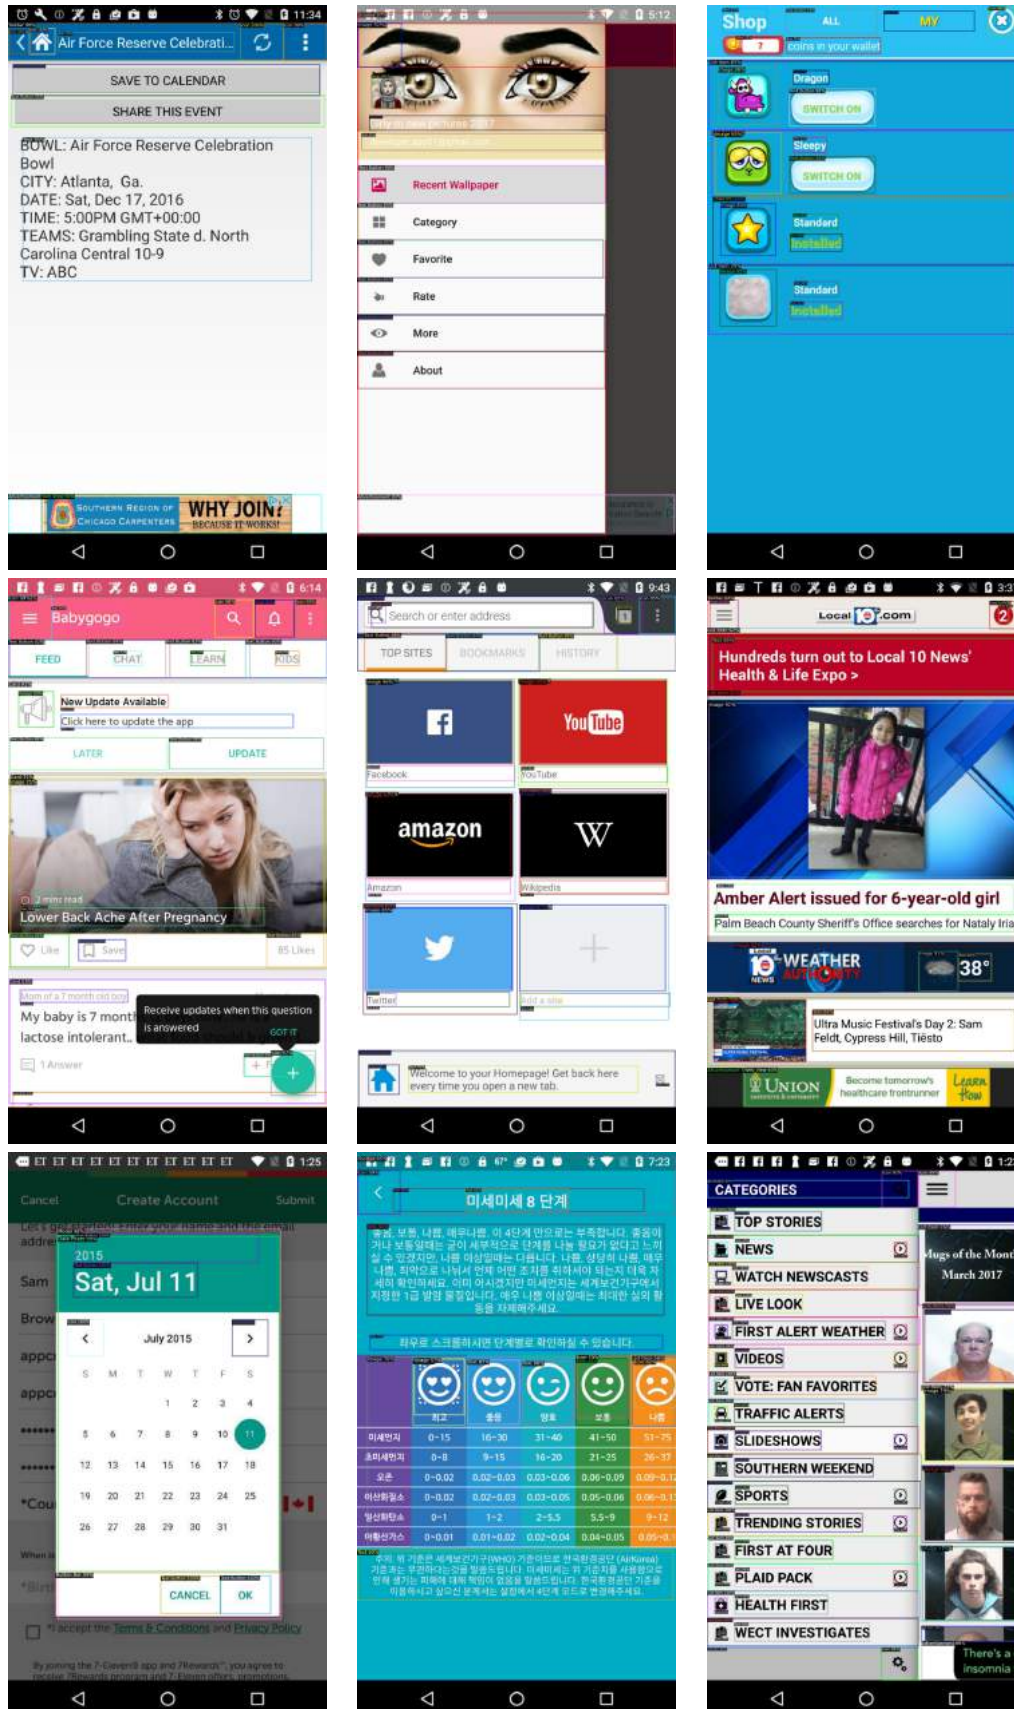

Figure 1. RICO screenshots parsed by Magic Layouts - 1.

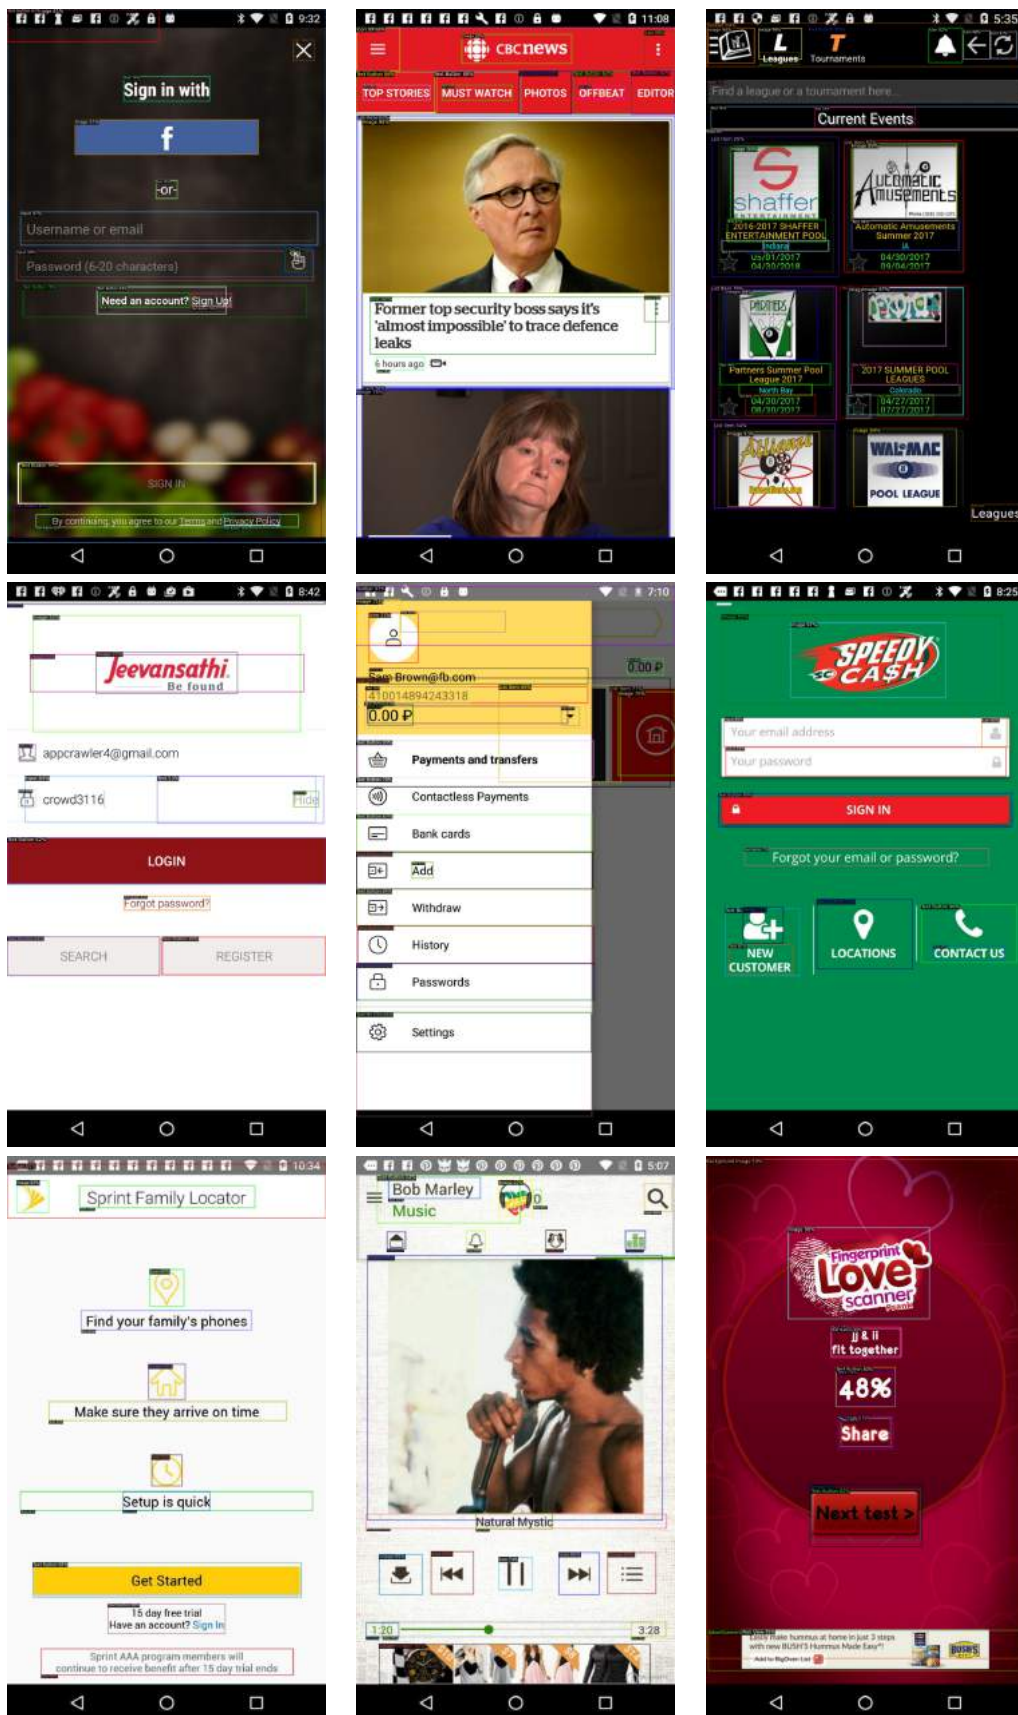

Figure 2. RICO screenshots parsed by Magic Layouts - 2.



## B. DrawnUI hand-sketched UXs

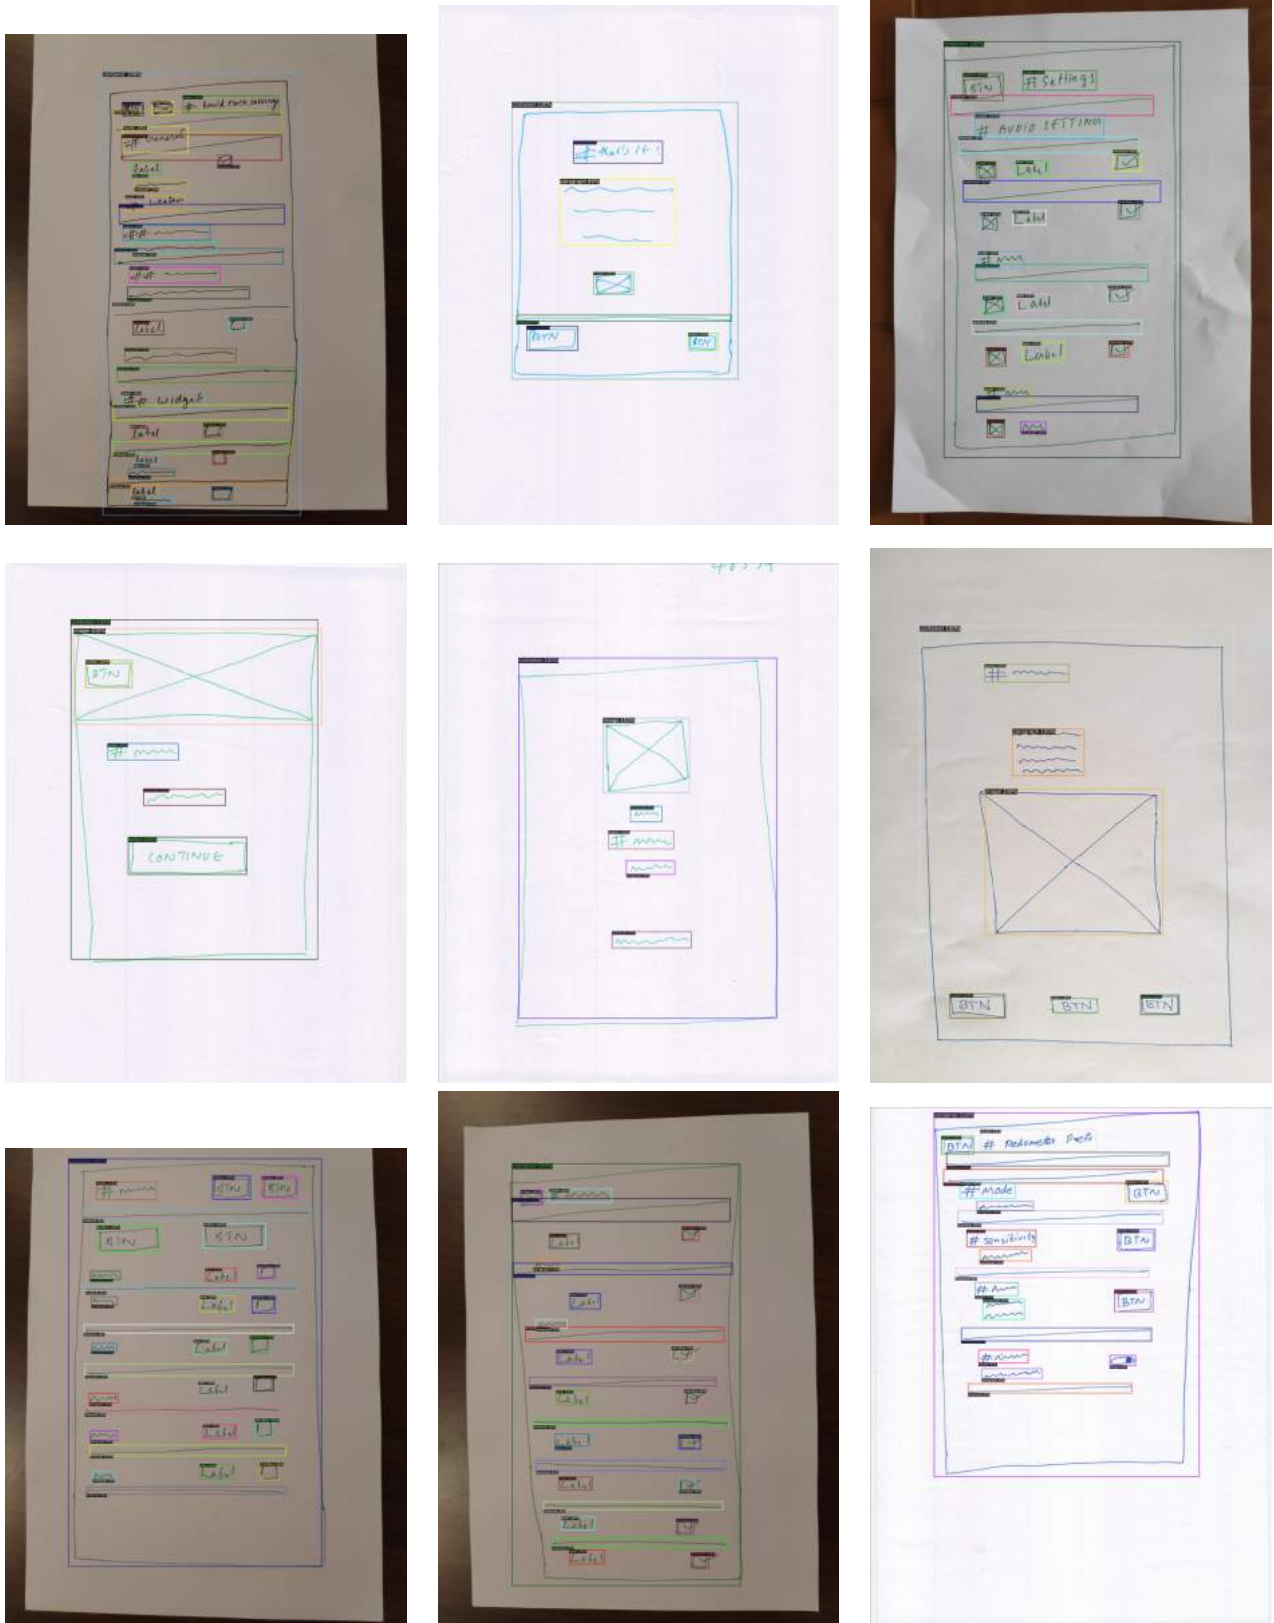

Figure 3. DrawnUI UX parsed by Magic Layouts - 1.

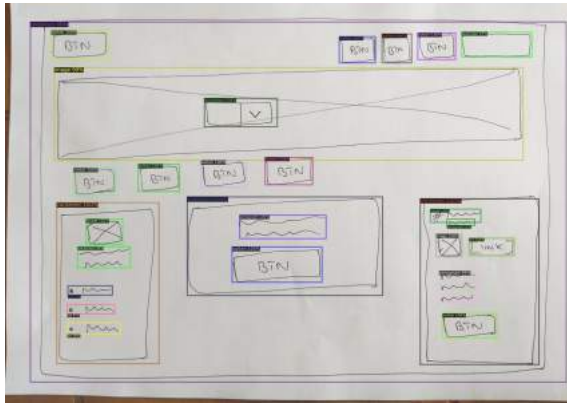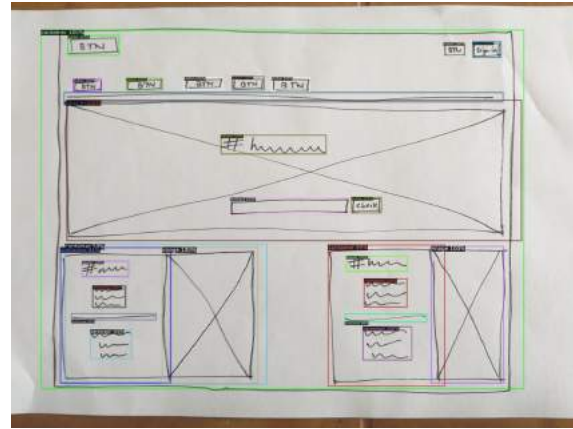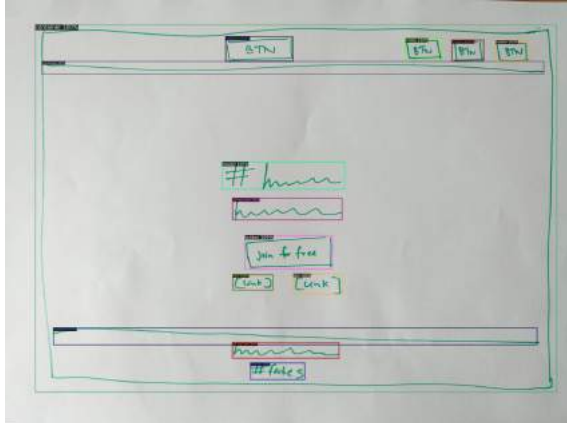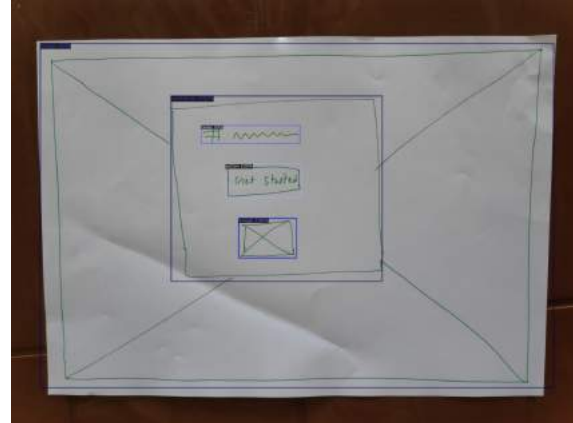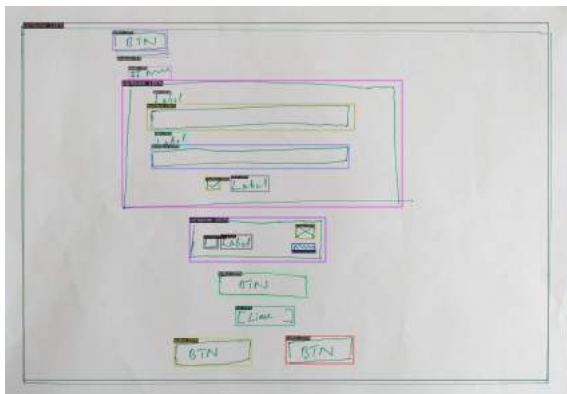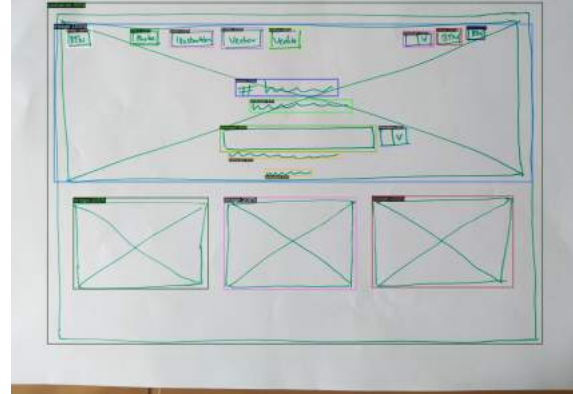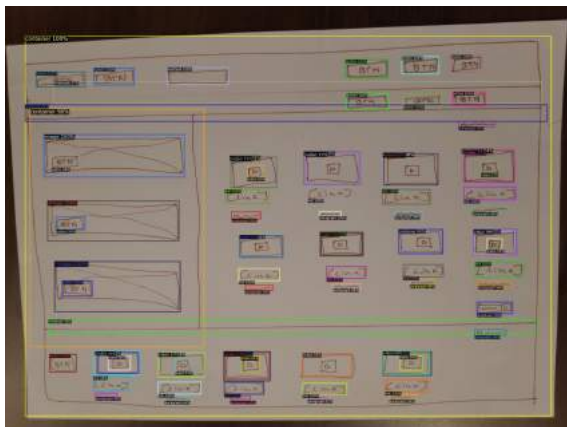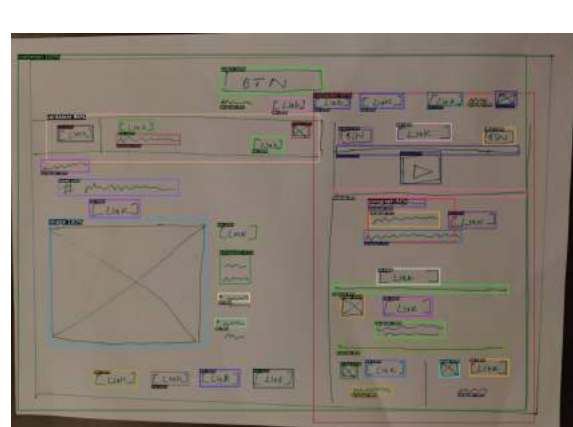

Figure 4. DrawnUI UX parsed by Magic Layouts - 2.
